# Supplementary material for: HIV and STI positivity rates among transgender people attending two large STI clinics in the Netherlands
Source: PubMed Central journal article supplement — Sex Transm Infect. 2021 Apr 19;98(3):188–96. doi: 10.1136/sextrans-2020-054875 (PMC9016236; doi:10.1136/sextrans-2020-054875), 2021-04-19
Supplement: sextrans-2020-054875supp001.pdf [file sextrans-2020-054875supp001.pdf]

## Achtergrond

Uit internationale data blijkt dat transgender personen (TGP) disproportioneel worden getroffen door hiv en seksueel overdraagbare aandoeningen (soa's). Data omtrent dit onderwerp zijn echter schaars in West-Europese landen. We beoordeelden genderidentiteiten, seksueel gedrag, hiv-prevalentie en soa-positiviteitsgraad, en vergeleken deze uitkomsten tussen TGP die sekswerk rapporteerden en degenen die dat niet deden.

## Methode

We hebben retrospectief data ingezameld van alle TGP die in 2017-2018 getest zijn bij de soa-klinieken van Amsterdam en Den Haag, Nederland. Om iemands genderidentiteit te identificeren werd een 'tweestaps'-methode gebruikt. Ten eerste werd het toegewezen geslacht bij de geboorte uitgevraagd; toegewezen als man bij geboorte of toegewezen als vrouw bij geboorte. Ten tweede werden cliënten gevraagd om hun genderidentiteit aan te geven: (1) transgender man/ transgender vrouw, (2) man en vrouw, (3) geen man noch vrouw, (4) anders of (5) nog niet bekend. De hiv-prevalentie, bacteriële soa (chlamydia, gonorrhoe en/ of infectieuze syfilis), positiviteit en seksueel gedrag werden bestudeerd met behulp van beschrijvende statistieken.

## Resultaten

TGP rapporteerden alle vijf mogelijke categorieën van genderidentiteiten. In totaal bezochten 273 TGP die bij de geboorte het mannelijk geslacht waren toegewezen (TGP-AMAB) (83,0%) en 56 TGP die bij de geboorte het vrouwelijk geslacht toegewezen hadden gekregen (TGP-AFAB) (17,0%). 14,6% (39/267; 95% BI, 10,6% tot 19,4%) TGP-AMAB waren hivpositief waarvan er twee nieuwe hiv- diagnoses zijn gesteld en 15,0% (40/267, 95% BI, 10,9% tot 19,8%) hadden een bacteriële soa. Onder TGP-AFAB was de bacteriële soa-positiviteit 5,6% (3/54, 95% BI-BI, 1,2% tot 15,4%) en er was geen sprake van een hiv-infectie. Sekswerk in de afgelopen zes maanden werd gerapporteerd door 53,3% (137/257, 95% BI, 47,0% tot 59,5%) van de TGP-AMAB en 6,1% (3/49, 95% BI, 1,3% tot 16,9%) van TGP-AFAB. De hiv-prevalentie verschilde niet tussen sekswerkers en niet-sekswerkers.

## Conclusie

Van alle TGP op de soa-poliklieken was het merendeel TGP-AMAB, van wie meer dan de helft sekswerk verrichtte. De hiv-prevalentie en soa-positiviteitscijfers waren substantieel onder TGP-AMAB en veel lager onder TGP-AFAB. Aanvullende onderzoeken moeten inzicht geven over de vraag of de bredere populatie van TGP-AMAB en TGP-AFAB een risico loopt op hiv en soa.
